# Supplementary material
Source: PubMed Central journal article supplement (PMC3538241)
Supplement: 1205532110_pnas.201205532SI.pdf [file 1205532110_pnas.201205532SI.pdf]

# Supporting Information

Andersen et al. 10.1073/pnas.1205532110

## SI Materials and Methods

**Fungal Growth, Extraction, and Isolation of Nidulanin A.** *Aspergillus nidulans* (IBT 22600) was inoculated as three-point stabs on 200 plates of MM and incubated in the dark at 30 °C for 7 d. The fungi were harvested and extracted twice overnight with EtOAc. The extract was filtered and concentrated in vacuo. The combined extract was dissolved in 100 mL of MeOH and H<sub>2</sub>O (9:1), and 100 mL of heptane was added after the phases were separated. Eighty milliliters of H<sub>2</sub>O was added to the MeOH/H<sub>2</sub>O phase, and metabolites were then extracted with 5 × 100 mL of dichloromethane (DCM). The phases were then concentrated separately in vacuo. The DCM phase (0.2021 g) was absorbed onto diol column material and dried before packing into a 10-g SNAP column [coefficient of variation (CV) = 15 mL; Biotage] with diol material. The extract was then fractionated on an Isolera flash purification system (Biotage) using seven steps of heptane-DCM-EtOAc-MeOH. A flow rate of 20 mL·min<sup>-1</sup> was used, and fractions were automatically collected with 2 × 2 CVs for each step. Solvents used were of HPLC grade, and H<sub>2</sub>O was milliQ-water (purified and deionized using a Millipore system through a 0.22- $\mu$ m membrane filter). Two of the Isolera fractions were subjected to further purification on separate runs on semipreparative HPLC (Waters 600 Controller with a 996-photodiode array detector). This was achieved using a Luna II C<sub>18</sub> column (250 mm × 10 mm, 5  $\mu$ m; Phenomenex). A linear water-MeCN gradient was used starting with 15% MeCN and increasing to 100% over 20 min using a flow rate of 4 mL·min<sup>-1</sup>. MeCN was of HPLC grade, and H<sub>2</sub>O was milliQ-water (purified and deionized using the Millipore system through a 0.22- $\mu$ m membrane filter); both were added to 50 ppm of TFA. The fractions obtained from the separate runs were pooled, and a final purification using the same method yielded 1.5 mg of nidulanin A.

**Marfey's Method.** Stereoisometry of the amino acids was elucidated using Marfey's method (1). One hundred micrograms of the peptide was hydrolyzed with 200  $\mu$ L of 6 M HCl at 110 °C for 20 h. To the hydrolysis product (or 2.5  $\mu$ mol of standard D- and L-amino acids) was added 50  $\mu$ L of water, 20  $\mu$ L of 1 M NaHCO<sub>3</sub> solution, and 100  $\mu$ L of 1% 1-fluoro-2,4-dinitrophenyl-5-L-alanine amide (FDAA) in acetone, followed by reaction at 40 °C for 1 h. The reaction mixture was removed from the heat and neutralized with 10  $\mu$ L of 2 M HCl, and the solution was diluted with 820  $\mu$ L of MeOH to a total volume of 1 mL. The retention times of the FDAA derivatives were compared with retention times of the standard amino acid derivatives.

**Analysis.** Analysis was performed using ultra-high-performance liquid chromatography (UHPLC) UV/Vis diode array detector (DAD) high-resolution MS (HRMS) on a maXis G3 orthogonal acceleration (OA) quadrupole-quadrupole time of flight (QQ-TOF) mass spectrometer (Bruker Daltonics) equipped with an electrospray injection (ESI) source and connected to an Ultimate 3000 UHPLC system (Dionex). The column used was a reverse-phase Kinetex 2.6- $\mu$ m C<sub>18</sub>, 100 mm × 2.1 mm (Phenomenex), and the column temperature was maintained at 40 °C. A linear water-acetonitrile gradient was used (both solvents were buffered with 20 mM formic acid) starting from 10% (vol/vol) MeCN and increased to 100% in 10 min, maintaining this rate for 3 min before returning to the starting conditions in 0.1 min and staying there for 2.4 min before the following run. A flow rate of 0.4 mL·min<sup>-1</sup> was used. HRMS was performed in ESI<sup>+</sup> with a data acquisition range of

10 scans per second at  $m/z$  100–1,000. The mass spectrometer was calibrated using Bruker Daltonics high precision calibration (HPC) by means of the use of the internal standard sodium formate, which was automatically infused before each run. UV spectra were collected at wavelengths from 200 to 700 nm. Data processing was performed using DataAnalysis software (Bruker Daltonics). HRMS analysis of nidulanin A was measured to 604.3497 Da corresponding to a molecular formula of C<sub>34</sub>H<sub>45</sub>N<sub>5</sub>O<sub>5</sub> (deviation of -0.6 ppm).

**NMR.** The 1D and 2D spectra were recorded on a Bruker Daltonics Avance 800-MHz spectrometer equipped with a 5-mm TCI Cryoprobe at the Danish Instrument Centre for NMR Spectroscopy of Biological Macromolecules at Carlsberg Laboratory. Spectra were acquired using standard pulse sequences, and a 1H spectrum, as well as COSY, NOESY, heteronuclear single quantum coherence (HSQC), and heteronuclear multiple bond correlation (HMBC) spectra, were acquired. The deuterated solvent was acetonitrile-*d*<sub>3</sub>, and signals were referenced by solvent signals for acetonitrile-*d*<sub>3</sub> at  $\delta_{\text{H}} = 1.94$  ppm and  $\delta_{\text{C}} = 1.32/118.26$  ppm. The NMR data were processed using Topspin 3.1 (Bruker Daltonics). Chemical shifts are reported in parts per million ( $\delta$ ), and scalar couplings are reported in hertz. The sizes of the *J* coupling constants reported in the tables are the experimentally measured values from the spectra. There are minor variations in the measurements, which may be explained by the uncertainty of *J*. NMR data for nidulanin A are presented in Table S3, and the structure is shown in Fig. S6.

**Protein Domain Predictions.** Nonribosomal peptide synthase (NRPS) protein domains were predicted using the analysis tool of Bachmann and Ravel (2) with the standard settings. Only domains with significant *P* values (*P* < 0.05) were included in the analysis. Adenylation domain specificities were predicted using NRPSpredictor (3).

**Structural Elucidation.** The 1H NMR spectrum of nidulanin A displayed four resonances at  $\delta_{\text{H}}$  8.16, 7.91, 7.64, and 7.51 ppm, which were identified as amide protons indicative of a non-ribosomal peptide type of compound. For each resonance, a COSY correlation to a proton further up-field in the  $\alpha$ -proton area could be observed. This coupled each of the amide protons to H $\alpha$  protons at resonances of  $\delta_{\text{H}}$  4.82, 3.92, 4.56, and 3.85 ppm, respectively. Investigation of the NOESY connectivities allowed for assembling of the peptide backbone, which revealed a cyclical tetrapeptide as illustrated in Fig. S7.

The two protons at  $\delta_{\text{H}}$  7.64 and 4.56 ppm were part of a larger spin system with correlations to a couple of diastereotopic protons at  $\delta_{\text{H}}$  3.02 [1H, doublet of doublets (dd), 14.4, 8.0] and 2.82 (1H, dd, 14.3, 7.5) ppm, as well as five aromatic protons at  $\delta_{\text{H}}$  7.14 [1H, multiplet (m)], 7.21 (2H, m), and 7.22 (2H, m). HMBC correlations from the diastereotopic pair as well as the aromatic protons revealed a quaternary carbon with a carbon chemical shift of 137.5 ppm. This information, put together, led to the amino acid phenylalanine. The protons at  $\delta_{\text{H}}$  7.91 and 3.92 ppm, as well as the protons at  $\delta_{\text{H}}$  7.51 and 3.85 ppm, had very similar spin systems. In both spin systems, a single proton appeared ( $\delta_{\text{H}}$  1.93 and 1.96, both multiplets), as well as two methyl groups as doublets ( $\delta_{\text{H}}$  0.71/0.78 ppm and 0.84/0.79 ppm). In both cases, the amino acid could be established as valine. Elucidation of the final part of the structure showed that this was not one of the standard proteinogenic amino acids. For this final part, three different spin systems, as well as two









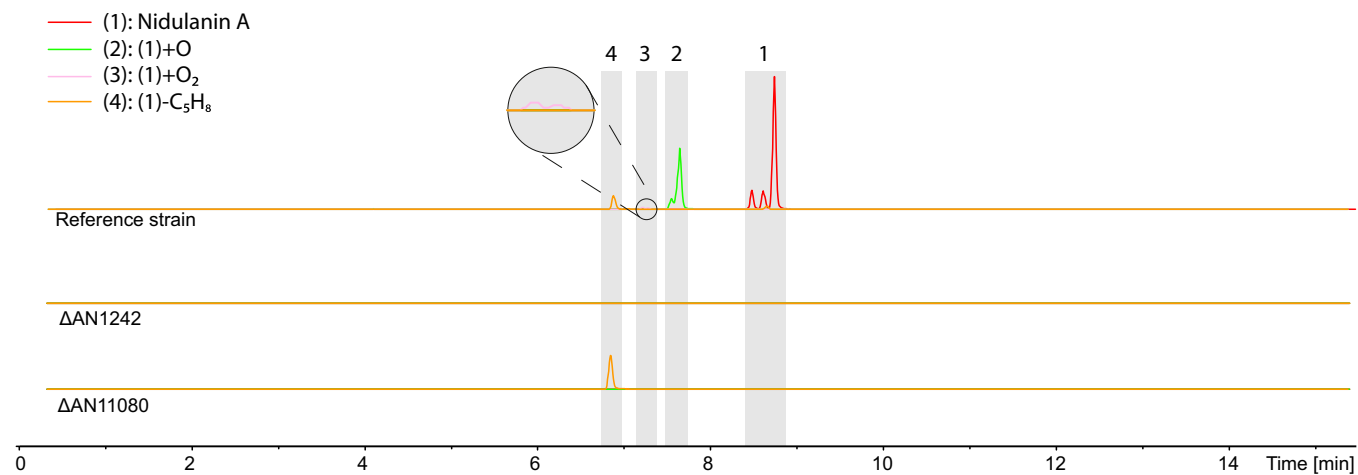

**Fig. S5.** Extracted ion chromatograms (EICs) for compounds 1–4. Mass tolerance  $\pm 0.005$  Da from UHPLC-DAD-HRMS of chemical extractions from the reference strain and  $\Delta$ AN1242 and  $\Delta$ AN11080 strains. DAD, diode array detector.

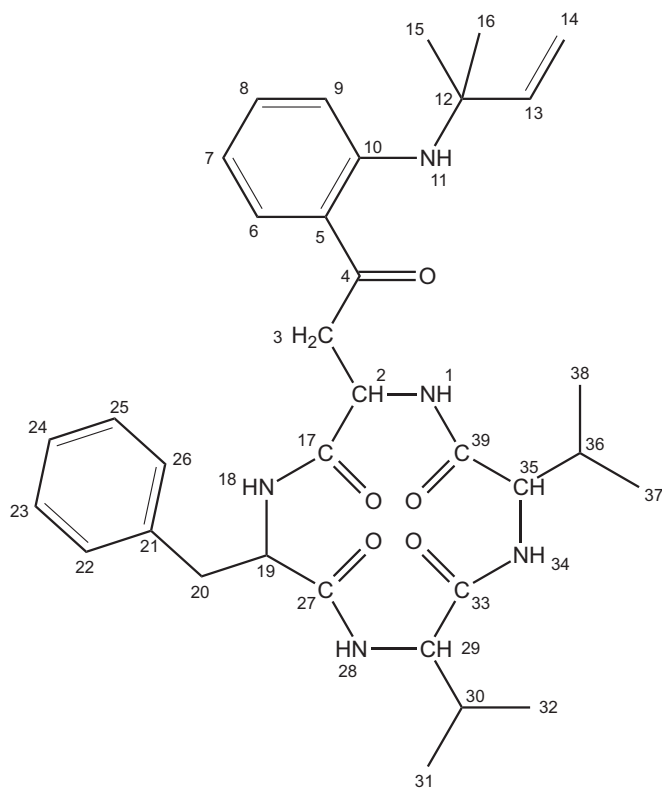

**Fig. S6.** Structure of nidulanin A, including numbering of individual atoms.



**Table S1. List of predicted biosynthetic genes where low expression indices with low variation across the 44 conditions were found**

| GeneID  | Type | Gene name   | Compound<br>(if known) | Gene no. | Known | Refs.  |
|---------|------|-------------|------------------------|----------|-------|--------|
| AN0523  | PKS  |             |                        |          | 4     | (1)    |
| AN1034  | PKS  | <i>afuE</i> | Asperfuranone          | 5        | 7     | (2, 3) |
| AN1036  | PKS  | <i>afuG</i> | Asperfuranone          | 5        | 7     | (2, 3) |
| AN10430 | PKS  |             |                        |          |       |        |
| AN3273  | PKS  |             |                        |          |       |        |
| AN3386  | PKS  |             |                        |          |       |        |
| AN3612  | PKS  |             |                        |          |       |        |
| AN5475  | PKS  |             |                        |          |       |        |
| AN6961  | NRPS |             |                        |          |       |        |
| AN9243  | NRPS |             |                        |          |       |        |
| AN9244  | NRPS |             |                        |          |       |        |
| AN6810  | DTS  |             |                        |          |       |        |

These genes are assumed to be silent in all 44 conditions. DTS, diterpene synthase; NRPS, nonribosomal peptide synthase; PKS, polyketide synthase.

1. Bromann K, et al. (2012) Identification and characterization of a novel diterpene gene cluster in *Aspergillus nidulans*. *PLoS ONE* 7(4):e35450.
2. Chiang YM, et al. (2008) Molecular genetic mining of the *Aspergillus* secondary metabolome: Discovery of the emericellamide biosynthetic pathway. *Chem Biol* 15(6):527–532.
3. Bergmann S, et al. (2010) Activation of a silent fungal polyketide biosynthesis pathway through regulatory cross talk with a cryptic nonribosomal peptide synthetase gene cluster. *Appl Environ Microbiol* 76(24):8143–8149.

**Table S2. Primer sequences**

| Primer name      | Sequence                                   |
|------------------|--------------------------------------------|
| AN1242-DL-Up-F   | GAGATCGTCGATGGAGTGGCG                      |
| AN1242-DL-Up-Rad | gatccccgggaattgccatgCTGCGAGGCACATCATGTTGCC |
| AN1242-DL-Dw-Fad | aattccagctgaccaccatgGGGTCTGGGTACGCGGGTTTG  |
| AN1242-DL-Dw-R   | GATGTGTAGGCGCGACATGGG                      |
| AN1242-CHK-Up-F  | CCGTCATCATCGTTATAGCC                       |
| AN1242-CHK-Dw-R  | GCACCCGCTATCACATAC                         |
| AN1242-GAPCHK-F  | GGCATTATGTGAGCTGTGCTGTG                    |
| AN1242-GAPCHK-R  | GATGGAGGGCTTGGCTTGG                        |
| AN1242-INTCHK-R  | GATCGAGACGGGTCGTTTAGG                      |
| AN11080-DL-Up-FU | GGGTTTAAUAGGCAGGTACCAATAATGA               |
| AN11080-DL-Up-RU | GGACTTAAUAGATATACGAGTATGCGG                |
| AN11080-DL-Dw-FU | GGCATTAAUAGTGCCTGATACTCTGC                 |
| AN11080-DL-Dw-RU | GGTCTTAAUGTTGAATCCCTCTGCCTT                |
| AN11080-CHK-Up-F | GGACGGCCCATATTCAGA                         |
| AN11080-CHK-Dw-R | AATAAGCTGTAGCGGCGA                         |



**Table S3. NMR data for nidulanin A in acetonitrile- $d_3$** 

| Atom assignment | $^1\text{H}$ -chemical shift, ppm/J<br>coupling constants, Hz | $^{13}\text{C}$ -chemical shift, ppm | HMBC correlations | NOE connectivities |
|-----------------|---------------------------------------------------------------|--------------------------------------|-------------------|--------------------|
| 1               | 8.16 (1H, d, 9.2)                                             | —                                    | —                 | 2, 3, 3', 35       |
| 2               | 4.82 (1H, ddd, 8.6, 7.0, 1.5)                                 | 48.2                                 | —                 | 1, 3, 3', 18       |
| 3               | 3.63 (1H, dd, 17.7, 9.7)                                      | 50.0                                 | 2, 4, 17          | 1, 2, 3', 6        |
| 3'              | 3.09 (1H, dd, 17.6, 4.9)                                      | 50.0                                 | 4                 | 1, 2, 3, 6         |
| 4               | —                                                             | 198.9                                | —                 | —                  |
| 5               | —                                                             | 116.6                                | —                 | —                  |
| 6               | 7.79 (1H, dd, 8.2, 1.5)                                       | 131.8                                | 4, 8, 10          | 3, 3', 7           |
| 7               | 6.57 (1H, ddd, 8.6, 7.0, 1.1)                                 | 114.3                                | 5, 9              | 6                  |
| 8               | 7.28 (1H, ddd, 8.6, 7.0, 1.5)                                 | 134.0                                | 6, 10             | —                  |
| 9               | 6.81 (1H, dd, 8.7, 0.7)                                       | 114.9                                | 5, 7              | 15, 16             |
| 10              | —                                                             | 148.7                                | —                 | —                  |
| 11              | 9.01 (1H, s)                                                  | —                                    | 5, 9, 12          | 15, 16             |
| 12              | —                                                             | 53.7                                 | —                 | —                  |
| 13              | 5.95 (1H, dd, 17.6, 10.7)                                     | 145.0                                | —                 | 14, 14'            |
| 14              | 5.13 (1H, dd, 10.7, 1.0)                                      | 113.3                                | 12                | 13                 |
| 14'             | 5.15 (1H, dd, 17.6, 1.0)                                      | 113.3                                | 12, 13            | 13                 |
| 15              | 1.39 (3H, s)                                                  | 27.8                                 | 12, 13, 16        | 9, 11              |
| 16              | 1.38 (3H, s)                                                  | 27.5                                 | 12, 13, 15        | 9, 11              |
| 17              | —                                                             | 172.1                                | —                 | —                  |
| 18              | 7.64 (1H, d, 8.4)                                             | —                                    | —                 | 2, 19, 20, 20'     |
| 19              | 4.56 (1H, q, 8.0)                                             | 53.7                                 | —                 | 18, 28, 20, 20'    |
| 20              | 3.02 (1H, dd, 14.4, 8.0)                                      | *                                    | 19, 21, 22/26     | 18, 19, 20'        |
| 20'             | 2.82 (1H, dd, 14.3, 7.5)                                      | *                                    | 19, 21, 22/26, 27 | 18, 19, 20         |
| 21              | —                                                             | 137.5                                | —                 | —                  |
| 22              | 7.22 (1H, m)                                                  | 128.0                                | 23/25             | —                  |
| 23              | 7.21 (1H, m)                                                  | 127.7                                | 21                | —                  |
| 24              | 7.14 (1H, m)                                                  | 126.4                                | —                 | —                  |
| 25              | 7.21 (1H, m)                                                  | 127.7                                | 21                | —                  |
| 26              | 7.22 (1H, m)                                                  | 128.0                                | 23/25             | —                  |
| 27              | —                                                             | 172.7                                | —                 | —                  |
| 28              | 7.91 (1H, d, 9.2)                                             | —                                    | —                 | 19, 29, 30, 31     |
| 29              | 3.92 (1H, d, 9.5)                                             | 59.1                                 | 27, 33            | 28, 30, 31, 32, 34 |
| 30              | 1.93 (1H, m)                                                  | 26.3                                 | —                 | 28, 29, 31, 32     |
| 31              | 0.71 (3H, d, 6.6)                                             | 18.1                                 | 29, 30, 32        | 28, 29, 30         |
| 32              | 0.78 (3H, d, 6.6)                                             | 18.9                                 | 29, 30, 31        | 29, 30             |
| 33              | —                                                             | 172.2                                | 172.6             | —                  |
| 34              | 7.51 (1H, d, 9.6)                                             | —                                    | —                 | 29, 36             |
| 35              | 3.85 (1H, dd, 9.8, 10.7)                                      | 59.4                                 | 33, 39            | 1, 36, 37, 38      |
| 36              | 1.96 (1H, m)                                                  | 26.9                                 | —                 | 34, 35, 37, 38     |
| 37              | 0.84 (3H, d, 6.7)                                             | 18.1                                 | 35, 36, 38        | 35, 36             |
| 38              | 0.79 (3H, d, 6.6)                                             | 18.9                                 | 35, 36, 37        | 35, 36             |
| 39              | —                                                             | 172.1                                | —                 | —                  |

$^1\text{H}$  NMR spectrum and 2D spectra were recorded at with a Bruker Daltonics Avance 800 MHz spectrometer at Carlsberg Laboratory. Signals were referenced to the solvent signals for acetonitrile- $d_3$  at  $\delta_{\text{H}} = 1.94$  ppm and  $\delta_{\text{C}} = 1.32/118.26$  ppm. There are minor variations in the measurements which may be explained by the uncertainty of  $J$ . d, doublet; dd, doublet of doublet; ddd, doublet of doublets of doublets; m, multiplet; q, quartet; s, singlet.

\*Cannot be unambiguously assigned.

#### Dataset S1. Overview of UHPLC-DAD-HRMS analysis of chemical extractions from the reference strain on three solid media after 4, 8, or 10 d (4d, 8d, and 10d, respectively)

##### [Dataset S1](#)

Values given are extracted ion chromatogram peak areas. DAD, diode array detector.

#### Dataset S2. Gene expression indices from 44 experimental conditions sorted according to chromosomal coordinates

##### [Dataset S2](#)

Locus names and annotation from the *Aspergillus* Genome Database ([www.ASPGD.org](http://www.ASPGD.org)) are given where available. Clustering scores and cluster members are given.
